# Supplementary material for: Cyclin-Dependent Kinase 5 Inhibitor Butyrolactone I Elicits a Partial Agonist Activity of Peroxisome Proliferator-Activated Receptor γ
Source: PubMed Central journal article supplement (PMC7072624; doi:10.3390/biom10020275), 2020-02-11
Supplement: biomolecules-10-00275-s001.pdf [file biomolecules-10-00275-s001.pdf]

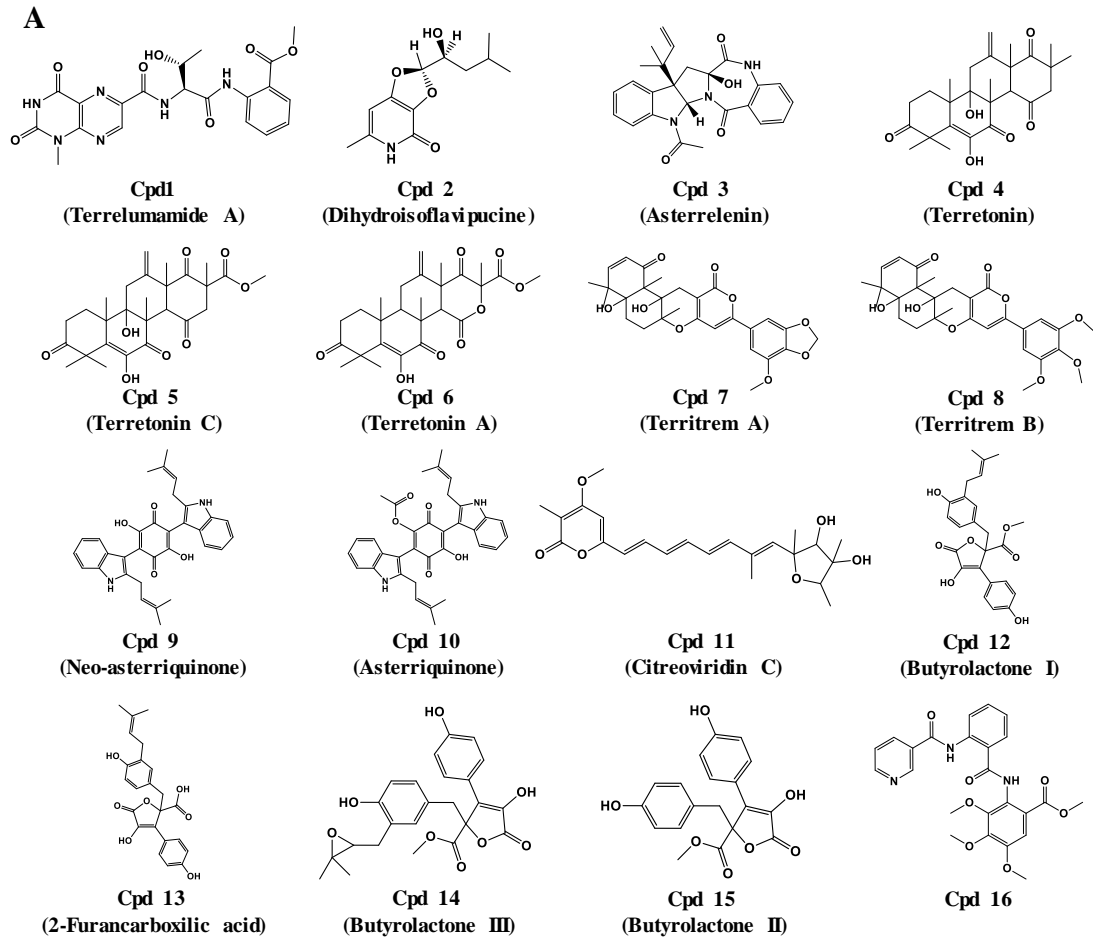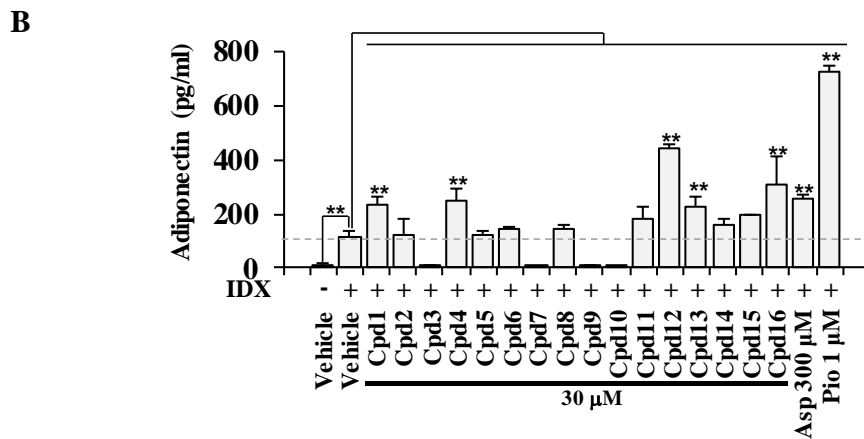

**Figure S1.** Adiponectin production-enhancing activity of secondary metabolite of the marine-derived *Aspergillus terreus*. (A) The structure of secondary metabolite of the marine-derived *Aspergillus terreus*. (B) Secondary metabolite were added to IDX medium when adipogenic differentiation was induced in hBM-MSCs. Cell culture supernatants were collected and adiponectin level was measured by ELISA on the fifth day. Pioglitazone (pio), and aspirin were used as positive controls. Values represent means  $\pm$  SD ( $n = 3$ ); \*  $p \leq 0.05$ , \*\*  $p \leq 0.01$ .

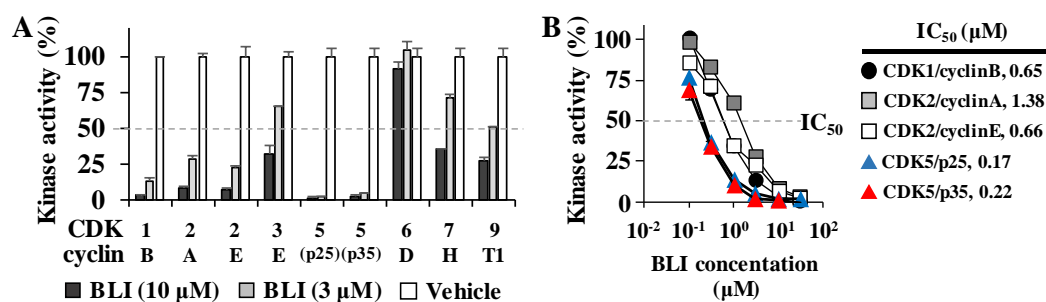

**Figure S2.** The kinase inhibitor assay with butyrolactone I. (A) The kinase activity was evaluated by measuring the  $\gamma$ -<sup>32</sup>P-ATP incorporation to CDK complexes. The inhibitory activities of butyrolactone I on the phosphorylation of CDK1/cyclin B, CDK2/cyclin A, CDK2/cyclin E, CDK3/cyclin E, CDK5/p25, CDK5/p35, CDK6/cyclin D, CDK7/cyclin H, and CDK9/cyclin T1 were tested at each  $K_m$  ATP concentration. DMSO was included in each negative control. (B) The  $IC_{50}$  values were calculated for butyrolactone I on kinase inhibition activity. Values were expressed in terms of percentage compared to each positive control.

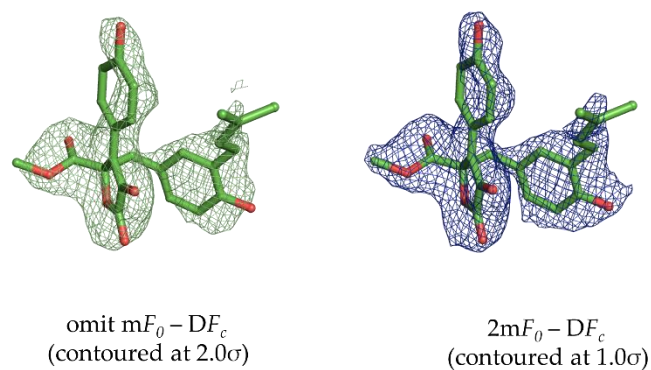

**Figure S3.** Electron density maps of butyrolactone I in chain B of butyrolactone I-bound PPAR $\gamma$  LBD. An omit map ( $mF_o - DF_c$ , contoured at  $2.0\sigma$ ) of butyrolactone I is displayed in green-colored mesh representation (left) and a model-refined map ( $2mF_o - DF_c$ , contoured at  $1.0\sigma$ ) of butyrolactone I is displayed in blue-colored mesh representation (right).

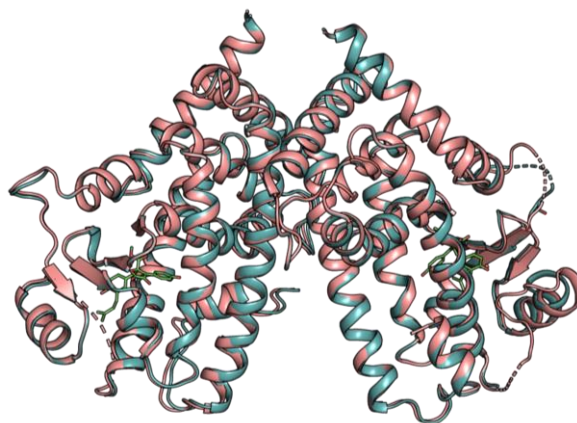

**Figure S4.** Structural comparison between ligand-free and butyrolactone I-bound PPAR $\gamma$  LBD. The structures of ligand-free PPAR $\gamma$  and butyrolactone I-bound PPAR $\gamma$  are displayed as cartoon representations in salmon and cyan, respectively. There are two PPAR $\gamma$  LBD molecules in an asymmetric unit (chain A and chain B). Two butyrolactone I molecules are shown as green-colored stick models and bound to the ligand binding pockets of PPAR $\gamma$  LBD.

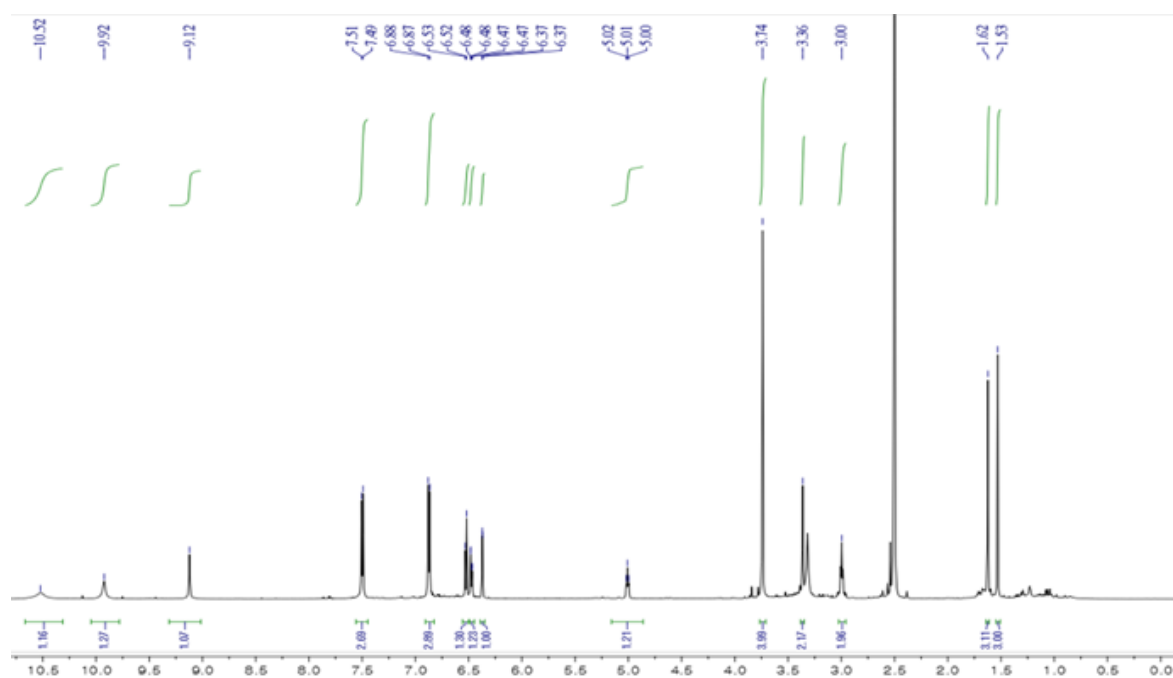

**Figure S5.** The  $^1\text{H}$  NMR (600 MHz,  $\text{DMSO-}d_6$ ) spectrum of butyrolactone I

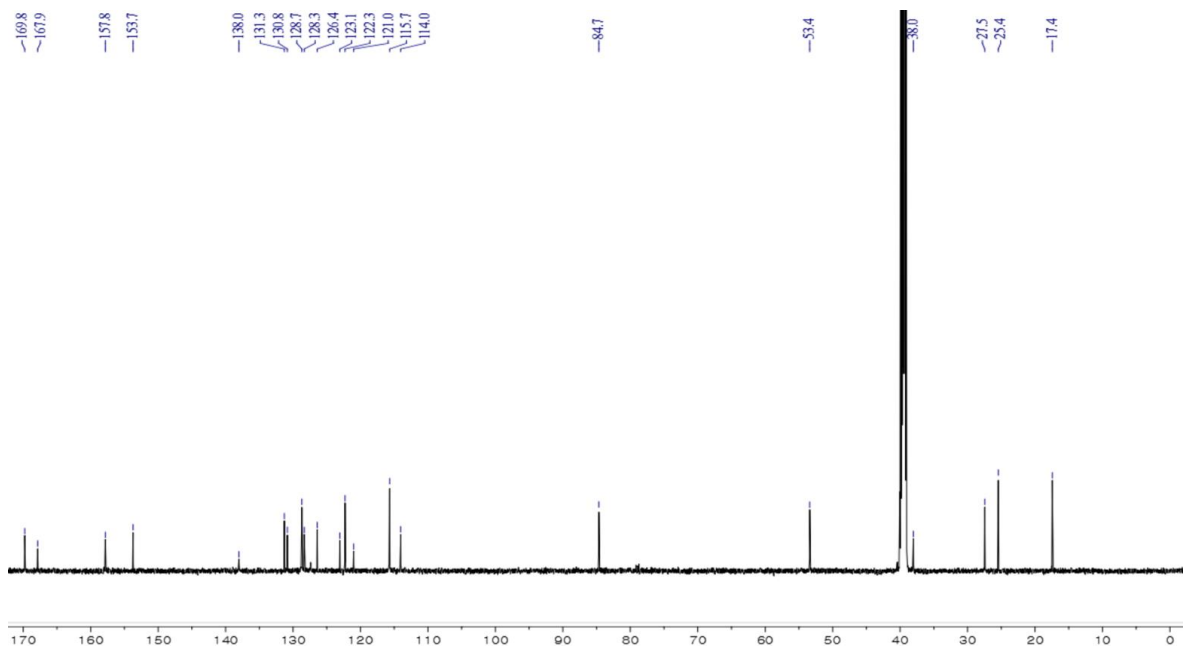

**Figure S6.** The  $^{13}\text{C}$  NMR (150 MHz,  $\text{DMSO-}d_6$ ) spectrum of butyrolactone I

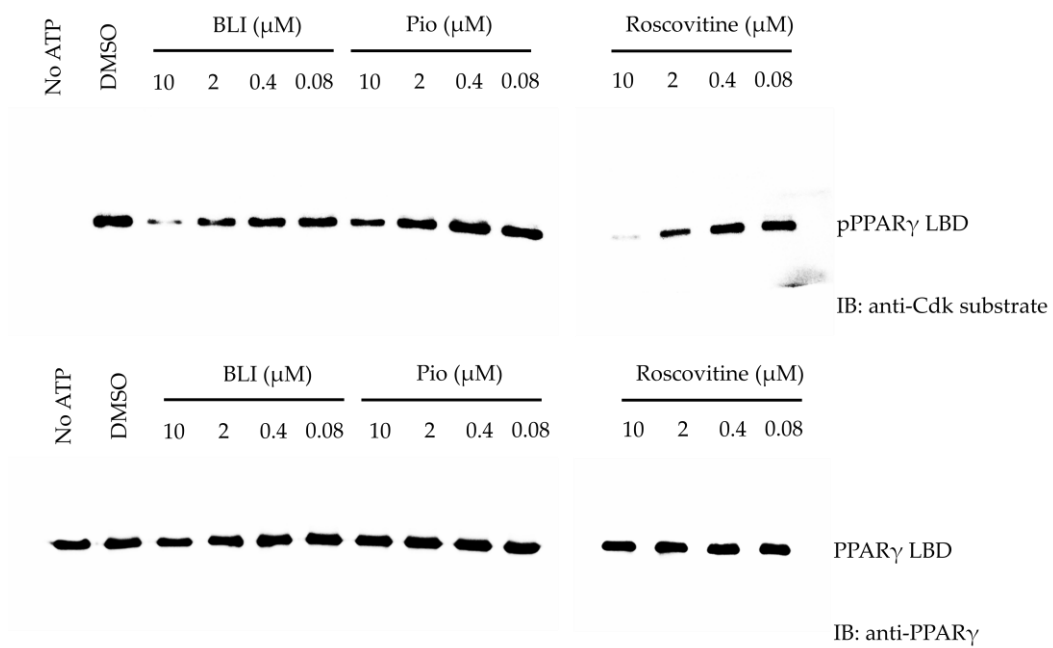

[Full length blots used in Figure 2 in the main manuscript.]
